# Supplementary material for: Extending the Affinity Range of Weak Affinity Chromatography for the Identification of Weak Ligands Targeting Membrane Proteins
Source: MDPI journal article supplement (doi:10.3390/molecules28207113), 2023-10-16
Supplement: s1 [file s1]

# Extending the affinity range of Weak Affinity Chromatography for the identification of weak ligands targeting membrane proteins

Adrien Deloche <sup>1</sup>, François-Xavier Vidal <sup>1</sup>, Lucile Jammes<sup>2</sup>, Renaud Wagner <sup>2</sup>, Vincent Dugas <sup>1</sup> and Claire Demesmay <sup>1,\*</sup>

<sup>1</sup> Université Claude Bernard Lyon 1, Institut des Sciences Analytiques, ISA UMR 5280, CNRS, 5 rue de la Doua, 69100 Villeurbanne, France 1; adrien.deloche@etu.univ-lyon1.fr (A.D.); francoisxaviervidal@live.fr (F.-X.V.); vincent.dugas@univ-lyon1.fr (V.D.)

<sup>2</sup> Plateforme IMPReSs, CNRS UMR7242, Biotechnologie et Signalisation Cellulaire, Ecole Supérieure de Biotechnologie de Strasbourg, Illkirch, France; renaud.wagner@unistra.fr

\* Correspondence: demesmay@univ-lyon1.fr.

## Supplementary Material S1 :

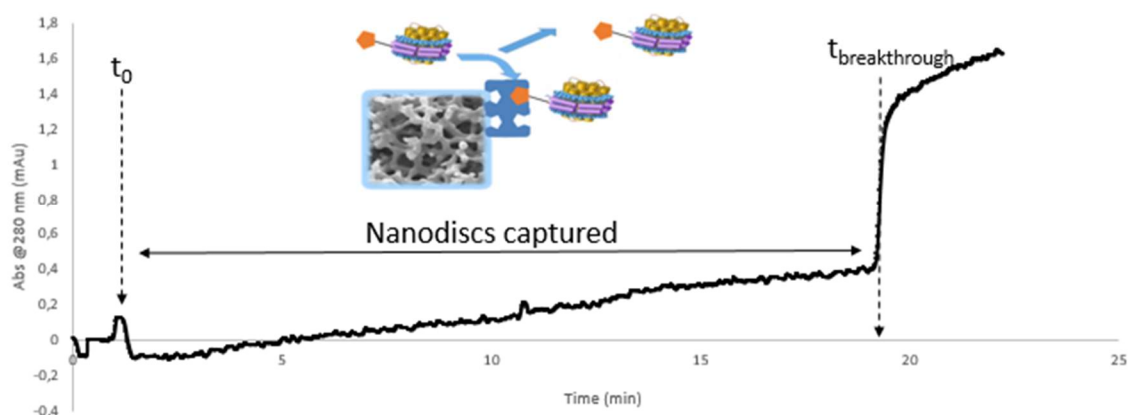

**Figure S1.** UV monitoring (@280 nm) of the capture of biotinylated AA<sub>2A</sub>R nanodiscs by the streptavidin monolith. AA<sub>2A</sub>R nanodiscs (2.6  $\mu$ M) solubilized in 50 mM HEPES pH 7.4, 150 mM NaCl; streptavidin monolith  $l = 8.5$  cm i.d 75  $\mu$ M; applied pressure 12 MPa (0.14 cm.s<sup>-1</sup>);  $t_{capture} = t_{breakthrough} - t_0 = 18.3$  min; amount of nanodiscs captured = 1.7 pmol/cm.

### Supplementary Material S2 :

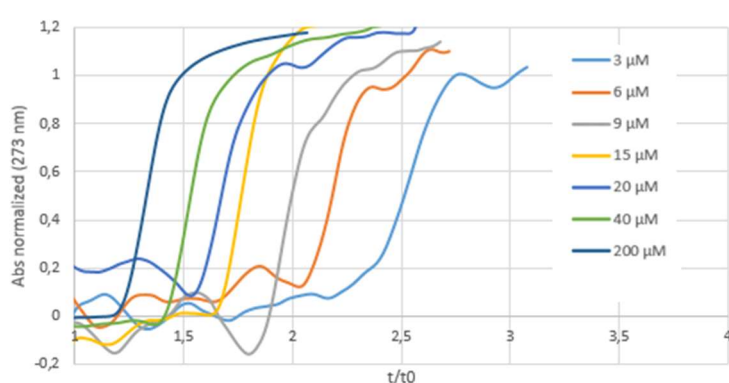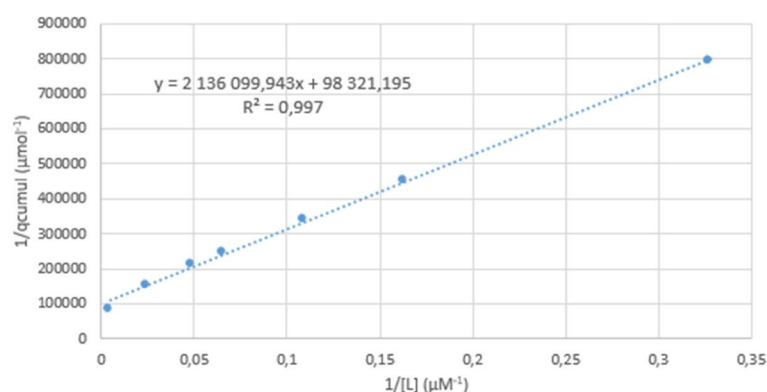

**Figure S2.** Frontal affinity chromatography experiments implemented to study the interaction between caffeine and immobilized AA<sub>2</sub>R- Caffeine solutions (solubilized in acetate buffer 20mM pH=7.4) are percolated at increasing concentrations ranging from 3 to 200μM on a poly(GMA-co- EDMA) monolith column functionalized with NDs; . Column dimension : l=8.5 cm, i.d = 75 μM; applied pressure 12 MPa (0.14 cm.s<sup>-1</sup>).

### Supplementary Material S3 :

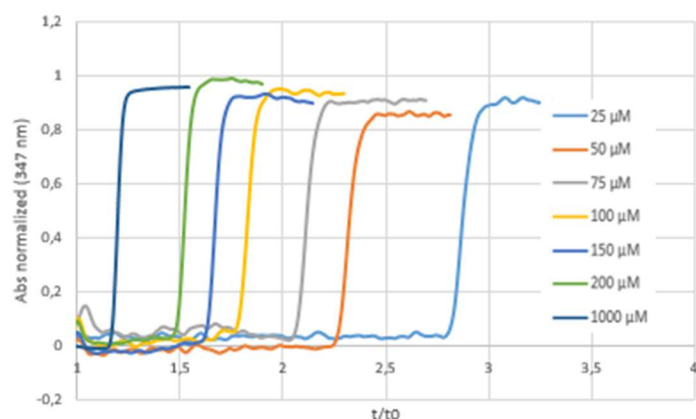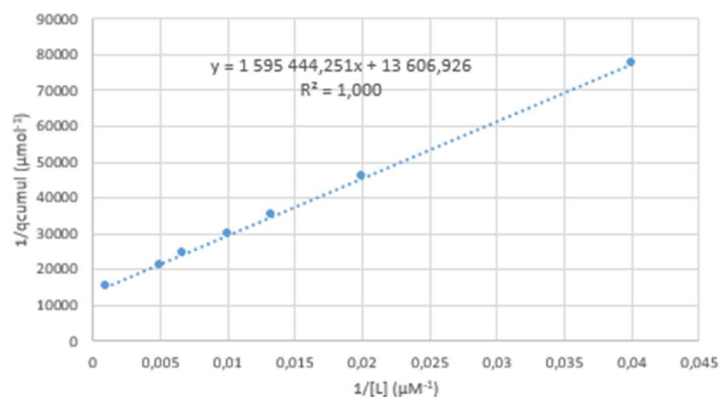

**Figure S3.** Frontal affinity chromatography analysis of the interaction between HABA and immobilized streptavidin on poly(GMA-co- EDMA) monolith column. Column dimension : l=8.5 cms i.d = 75 μM; applied pressure 12 MPa (0.14 cm.s<sup>-1</sup>).

### Supplementary Material S4 :

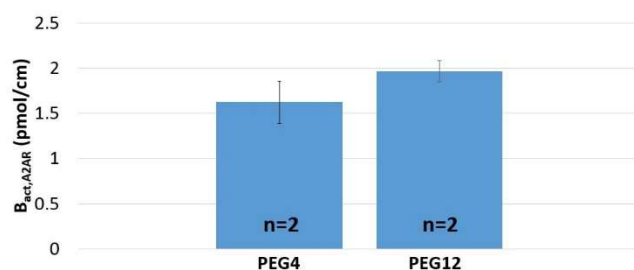

**Figure S4.** Comparison of the number of active binding sites determined on monolithic capillary columns using AA<sub>2</sub>R nanodiscs functionalized with biotin-PEG4 and biotin-PEG 12 linkers.
